# Supplementary material
Source: Springer Nature journal article supplement (https://www.springermedizin.de/resource/supplementary/13054_2012_727_MOESM1_ESM.pdf/9709060)
Supplement: MOESM1 [file 9709060]

6657 citations screened for inclusion.  
6324 from MEDLINE, EMBASE, EMBASE  
Classic  
333 from Cochrane Central Registrar of  
Controlled Trials  
4 from conference proceedings

6616 citations excluded  
based on screening  
criteria

41 citations retrieved for detailed evaluation

22 citations excluded  
1 – Randomized comparison of  
filtration and dialysis in patients  
without acute renal failure [40]\*  
7 – Non-randomized comparison  
of filtration and dialysis [41-47]  
8 – RCT of a non-mode  
intervention [48-55]  
4 – Neither randomized nor  
comparison between filtration and  
dialysis [56-59]  
2 – Partial duplicate publication  
[60,61]

19 RCTs included in meta-analysis  
10 parallel-group [21-30]  
9 crossover [31-39]
